# Supplementary material
Source: ML conference proceedings conference paper supplement (https://proceedings.neurips.cc/paper_files/paper/2013/hash/f73b76ce8949fe29bf2a537cfa420e8f-Abstract.html)
Supplement: Supplementary file [file f73b76ce8949fe29bf2a537cfa420e8f-Supplemental.zip]

---

# Supplementary Material for Mixed Optimization for Smooth Functions

---

**Mehrdad Mahdavi   Lijun Zhang   Rong Jin**

Department of Computer Science and Engineering, Michigan State University, MI, USA  
{mahdavi, zhanglij, rongjin}@msu.edu

Before proving the lemmas we recall the definition of  $\mathcal{F}(\mathbf{w})$ ,  $\mathcal{F}'(\mathbf{w})$ ,  $\mathbf{g}$ , and  $\hat{g}_i(\mathbf{w})$  as:

$$\begin{aligned}\mathcal{F}(\mathbf{w}) &= \frac{\lambda}{2}\|\mathbf{w}\|^2 + \lambda\langle\mathbf{w}, \bar{\mathbf{w}}\rangle + \frac{1}{n}\sum_{i=1}^n g_i(\mathbf{w} + \bar{\mathbf{w}}), \\ \mathcal{F}'(\mathbf{w}) &= \frac{\lambda}{2\gamma}\|\mathbf{w}\|^2 + \frac{\lambda}{\gamma}\langle\mathbf{w}, \bar{\mathbf{w}}'\rangle + \frac{1}{n}\sum_{i=1}^n g_i(\mathbf{w} + \bar{\mathbf{w}}'), \\ \mathbf{g} &= \lambda\bar{\mathbf{w}} + \frac{1}{n}\sum_{i=1}^n \nabla g_i(\bar{\mathbf{w}}), \\ \hat{g}_i(\mathbf{w}) &= g_i(\mathbf{w} + \bar{\mathbf{w}}) - \langle\mathbf{w}, \nabla g_i(\bar{\mathbf{w}})\rangle.\end{aligned}$$

We also recall that  $\hat{\mathbf{w}}_*$  and  $\hat{\mathbf{w}}'_*$  are the optimal solutions that minimize  $\mathcal{F}(\mathbf{w})$  and  $\mathcal{F}'(\mathbf{w})$  over the domain  $\mathcal{W}_k$  and  $\mathcal{W}_{k+1}$ , respectively.

**Lemma 1.**

$$\begin{aligned}\mathcal{F}(\mathbf{w}_t) - \mathcal{F}(\hat{\mathbf{w}}_*) &\leq \frac{\|\mathbf{w}_t - \hat{\mathbf{w}}_*\|^2}{2\eta} - \frac{\|\mathbf{w}_{t+1} - \hat{\mathbf{w}}_*\|^2}{2\eta} + \frac{\eta}{2}\|\nabla\hat{g}_{i_t}(\mathbf{w}_t) + \lambda\mathbf{w}_t\|^2 + \langle\mathbf{g}, \mathbf{w}_t - \mathbf{w}_{t+1}\rangle \\ &\quad + \left\langle \nabla\hat{g}_{i_t}(\hat{\mathbf{w}}_*) - \nabla\hat{\mathcal{F}}(\hat{\mathbf{w}}_*), \mathbf{w}_t - \hat{\mathbf{w}}_* \right\rangle + \left\langle -\nabla\hat{g}_{i_t}(\mathbf{w}_t) + \nabla\hat{g}_{i_t}(\hat{\mathbf{w}}_*) - \nabla\hat{\mathcal{F}}(\hat{\mathbf{w}}_*) + \nabla\hat{\mathcal{F}}(\mathbf{w}_t), \mathbf{w}_t - \hat{\mathbf{w}}_* \right\rangle\end{aligned}$$

*Proof.* For each iteration  $t$  in the  $k$ th epoch, from the strong convexity of  $\mathcal{F}(\mathbf{w})$  we have

$$\begin{aligned}\mathcal{F}(\mathbf{w}_t) - \mathcal{F}(\hat{\mathbf{w}}_*) &\leq \langle\nabla\mathcal{F}(\mathbf{w}_t), \mathbf{w}_t - \hat{\mathbf{w}}_*\rangle - \frac{\lambda}{2}\|\mathbf{w}_t - \hat{\mathbf{w}}_*\|^2 \\ &= \langle\mathbf{g} + \nabla\hat{g}_{i_t}(\mathbf{w}_t) + \lambda\mathbf{w}_t, \mathbf{w}_t - \hat{\mathbf{w}}_*\rangle + \left\langle -\nabla\hat{g}_{i_t}(\mathbf{w}_t) + \nabla\hat{\mathcal{F}}(\mathbf{w}_t), \mathbf{w}_t - \hat{\mathbf{w}}_* \right\rangle - \frac{\lambda}{2}\|\mathbf{w}_t - \hat{\mathbf{w}}_*\|^2,\end{aligned}$$

where  $\hat{\mathcal{F}}(\mathbf{w}) = \frac{1}{n}\sum_{i=1}^n \hat{g}_i(\mathbf{w})$ . We now try to upper bound the first term in the right hand side. Since

$$\begin{aligned}&\langle\mathbf{g} + \nabla\hat{g}_{i_t}(\mathbf{w}_t) + \lambda\mathbf{w}_t, \mathbf{w}_t - \hat{\mathbf{w}}_*\rangle \\ &= \langle\mathbf{g} + \nabla\hat{g}_{i_t}(\mathbf{w}_t) + \lambda\mathbf{w}_t, \mathbf{w}_t - \hat{\mathbf{w}}_*\rangle - \frac{\|\mathbf{w}_t - \hat{\mathbf{w}}_*\|^2}{2\eta} + \frac{\|\mathbf{w}_t - \hat{\mathbf{w}}_*\|^2}{2\eta} \\ &\leq \langle\mathbf{g} + \nabla\hat{g}_{i_t}(\mathbf{w}_t) + \lambda\mathbf{w}_t, \mathbf{w}_t - \mathbf{w}_{t+1}\rangle - \frac{\|\mathbf{w}_t - \mathbf{w}_{t+1}\|^2}{2\eta} - \frac{\|\mathbf{w}_{t+1} - \hat{\mathbf{w}}_*\|^2}{2\eta} + \frac{\|\mathbf{w}_t - \hat{\mathbf{w}}_*\|^2}{2\eta} \\ &\leq \langle\mathbf{g}, \mathbf{w}_t - \mathbf{w}_{t+1}\rangle - \frac{\|\mathbf{w}_{t+1} - \hat{\mathbf{w}}_*\|^2}{2\eta} + \frac{\|\mathbf{w}_t - \hat{\mathbf{w}}_*\|^2}{2\eta} + \max_{\mathbf{w}} \left[ \langle\nabla\hat{g}_{i_t}(\mathbf{w}_t) + \lambda\mathbf{w}_t, \mathbf{w}_t - \mathbf{w}\rangle - \frac{\|\mathbf{w}_t - \mathbf{w}\|^2}{2\eta} \right] \\ &= \langle\mathbf{g}, \mathbf{w}_t - \mathbf{w}_{t+1}\rangle - \frac{\|\mathbf{w}_{t+1} - \hat{\mathbf{w}}_*\|^2}{2\eta} + \frac{\|\mathbf{w}_t - \hat{\mathbf{w}}_*\|^2}{2\eta} + \frac{\eta}{2}\|\nabla\hat{g}_{i_t}(\mathbf{w}_t) + \lambda\mathbf{w}_t\|^2\end{aligned}$$

where the first inequality follows from the fact that  $\mathbf{w}_{t+1}$  is the minimizer of the following optimization problem:

$$\mathbf{w}_{t+1} = \arg \min_{\mathbf{w} \in \mathcal{W} \wedge \|\mathbf{w} - \widehat{\mathbf{w}}\| \leq \Delta} \langle \mathbf{g} + \nabla \widehat{g}_t(\mathbf{w}_t) + \lambda \mathbf{w}_t, \mathbf{w} - \mathbf{w}_t \rangle + \frac{\|\mathbf{w} - \mathbf{w}_t\|^2}{2\eta}.$$

Therefore, we obtain

$$\begin{aligned} & \mathcal{F}(\mathbf{w}_t) - \mathcal{F}(\widehat{\mathbf{w}}_*) \\ & \leq \frac{\|\mathbf{w}_t - \widehat{\mathbf{w}}_*\|^2}{2\eta} - \frac{\|\mathbf{w}_{t+1} - \widehat{\mathbf{w}}_*\|^2}{2\eta} - \frac{\lambda}{2} \|\mathbf{w}_t - \widehat{\mathbf{w}}_*\|^2 \\ & \quad + \langle \mathbf{g}, \mathbf{w}_t - \mathbf{w}_{t+1} \rangle + \frac{\eta}{2} \|\nabla \widehat{g}_t(\mathbf{w}_t) + \lambda \mathbf{w}_t\|^2 + \left\langle \nabla \widehat{\mathcal{F}}(\widehat{\mathbf{w}}_*) - \nabla \widehat{g}_t(\widehat{\mathbf{w}}_*), \mathbf{w}_t - \widehat{\mathbf{w}}_* \right\rangle \\ & \quad + \left\langle -\nabla \widehat{g}_t(\mathbf{w}_t) + \nabla \widehat{g}_t(\widehat{\mathbf{w}}_*) - \nabla \widehat{\mathcal{F}}(\widehat{\mathbf{w}}_*) + \nabla \widehat{\mathcal{F}}(\mathbf{w}_t), \mathbf{w}_t - \widehat{\mathbf{w}}_* \right\rangle, \end{aligned}$$

as desired.  $\square$

We now turn to prove the upper bound on  $A_T$ .

**Lemma 2.**

$$A_T \leq 6\beta^2 \Delta^2 T$$

*Proof.* We bound  $A_T$  as

$$\begin{aligned} A_T &= \sum_{t=1}^T \|\nabla \widehat{g}_t(\mathbf{w}_t) + \lambda \mathbf{w}_t\|^2 \\ &\leq \sum_{t=1}^T 2\|\nabla \widehat{g}_t(\mathbf{w}_t)\|^2 + 2\lambda^2 \|\mathbf{w}_t\|^2 \\ &\leq \sum_{t=1}^T 2\lambda^2 \Delta^2 + 2\|\nabla \widehat{g}_t(\mathbf{w}_t) - \nabla \widehat{g}_t(\widehat{\mathbf{w}}_*) + \nabla \widehat{g}_t(\widehat{\mathbf{w}}_*)\|^2 \leq 6\beta^2 \Delta^2 T \end{aligned}$$

where the second inequality follows  $(a + b)^2 \leq 2(a^2 + b^2)$  and the last inequality follows from the smoothness assumption.  $\square$

**Lemma 3.** *With a probability  $1 - 2\delta$ , we have*

$$B_T \leq \beta \Delta^2 \left( \ln \frac{1}{\delta} + \sqrt{2T \ln \frac{1}{\delta}} \right) \quad \text{and} \quad C_T \leq 2\beta \Delta^2 \left( \ln \frac{1}{\delta} + \sqrt{2T \ln \frac{1}{\delta}} \right)$$

The proof is based on the Bernstein inequality for Martingales [1] which is restated here for completeness.

**Theorem 1.** (*Bernstein's inequality for martingales*). *Let  $X_1, \dots, X_n$  be a bounded martingale difference sequence with respect to the filtration  $\mathcal{F} = (\mathcal{F}_i)_{1 \leq i \leq n}$  and with  $\|X_i\| \leq K$ . Let*

$$S_i = \sum_{j=1}^i X_j$$

*be the associated martingale. Denote the sum of the conditional variances by*

$$\Sigma_n^2 = \sum_{t=1}^n \mathbb{E}[X_t^2 | \mathcal{F}_{t-1}],$$

*Then for all constants  $t, \nu > 0$ ,*

$$\Pr \left[ \max_{i=1, \dots, n} S_i > t \text{ and } \Sigma_n^2 \leq \nu \right] \leq \exp \left( -\frac{t^2}{2(\nu + Kt/3)} \right),$$

*and therefore,*

$$\Pr \left[ \max_{i=1, \dots, n} S_i > \sqrt{2\nu t} + \frac{\sqrt{2}}{3} Kt \text{ and } \Sigma_n^2 \leq \nu \right] \leq e^{-t}.$$

Equipped with this theorem, we are now in a position to upper bound  $B_T$  and  $C_T$  as follows.

*Proof.* (of Lemma 3) Denote  $X_t = \langle \nabla \hat{g}_t(\hat{\mathbf{w}}_*) - \nabla \hat{\mathcal{F}}(\hat{\mathbf{w}}_*), \mathbf{w}_t - \hat{\mathbf{w}}_* \rangle$ . We have that the conditional expectation of  $X_t$ , given randomness in previous rounds, is  $\mathbb{E}_{t-1}[X_t] = 0$ . We now apply Theorem 1 to the sum of martingale differences. In particular, we have, with a probability  $1 - e^{-t}$ ,

$$B_T \leq \frac{\sqrt{2}}{3} Kt + \sqrt{2\Sigma t}$$

where

$$\begin{aligned} K &= \max_{1 \leq t \leq T} \langle \nabla \hat{g}_t(\hat{\mathbf{w}}_*) - \nabla \hat{\mathcal{F}}(\hat{\mathbf{w}}_*), \mathbf{w}_t - \hat{\mathbf{w}}_* \rangle \leq 2\beta\Delta^2 \\ \Sigma &= \sum_{t=1}^T \mathbb{E}_t \left[ |\langle \nabla \hat{g}_t(\hat{\mathbf{w}}_*) - \nabla \hat{\mathcal{F}}(\hat{\mathbf{w}}_*), \mathbf{w}_t - \hat{\mathbf{w}}_* \rangle|^2 \right] \leq \beta^2 \Delta^4 T \end{aligned}$$

Hence, with a probability  $1 - \delta$ , we have

$$B_T \leq \beta\Delta^2 \left( \ln \frac{1}{\delta} + \sqrt{2T \ln \frac{1}{\delta}} \right)$$

Similar, for  $C_T$ , we have, with a probability  $1 - \delta$ ,

$$C_T \leq 2\beta\Delta^2 \left( \ln \frac{1}{\delta} + \sqrt{2T \ln \frac{1}{\delta}} \right)$$

□

**Lemma 4.**  $\|\hat{\mathbf{w}}'_*\| \leq \gamma \|\tilde{\mathbf{w}} - \hat{\mathbf{w}}_*\|$ .

*Proof.* We rewrite  $\mathcal{F}(\mathbf{w})$  as

$$\begin{aligned} \mathcal{F}(\mathbf{w}) &= \frac{\lambda}{2} \|\mathbf{w}\|^2 + \lambda \langle \mathbf{w}, \bar{\mathbf{w}} \rangle + \frac{1}{n} \sum_{i=1}^n g_i(\mathbf{w} + \bar{\mathbf{w}}) \\ &= \frac{\lambda}{2} \|\mathbf{w} - \tilde{\mathbf{w}} + \tilde{\mathbf{w}}\|^2 + \lambda \langle \mathbf{w} - \tilde{\mathbf{w}} + \tilde{\mathbf{w}}, \bar{\mathbf{w}} \rangle + \frac{1}{n} \sum_{i=1}^n g_i(\mathbf{w} - \tilde{\mathbf{w}} + \bar{\mathbf{w}}') \end{aligned}$$

Define  $\mathbf{z} = \mathbf{w} - \tilde{\mathbf{w}}$ . We have

$$\begin{aligned} \mathcal{F}(\mathbf{w}) &= \frac{\lambda}{2} \|\mathbf{z} + \tilde{\mathbf{w}}\|^2 + \lambda \langle \mathbf{z}, \bar{\mathbf{w}} \rangle + \lambda \langle \tilde{\mathbf{w}}, \bar{\mathbf{w}} \rangle + \frac{1}{n} \sum_{i=1}^n g_i(\mathbf{z} + \bar{\mathbf{w}}') \\ &= \frac{\lambda}{2} \|\mathbf{z}\|^2 + \lambda \langle \mathbf{z}, \bar{\mathbf{w}}' \rangle + \frac{1}{n} \sum_{i=1}^n g_i(\mathbf{z} + \bar{\mathbf{w}}') + \frac{\lambda}{2} \|\tilde{\mathbf{w}}\|^2 + \lambda \langle \tilde{\mathbf{w}}, \bar{\mathbf{w}} \rangle \\ &= \tilde{\mathcal{F}}(\mathbf{z}) + \frac{\lambda}{2} \|\tilde{\mathbf{w}}\|^2 + \lambda \langle \tilde{\mathbf{w}}, \bar{\mathbf{w}} \rangle \end{aligned}$$

where

$$\tilde{\mathcal{F}}(\mathbf{z}) = \frac{\lambda}{2} \|\mathbf{z}\|^2 + \lambda \langle \mathbf{z}, \bar{\mathbf{w}}' \rangle + \frac{1}{n} \sum_{i=1}^n g_i(\mathbf{z} + \bar{\mathbf{w}}')$$

Define  $\tilde{\mathbf{w}}_* = \hat{\mathbf{w}}_* - \tilde{\mathbf{w}}$ . Evidently,  $\tilde{\mathbf{w}}_*$  minimizes  $\tilde{\mathcal{F}}(\mathbf{w})$ . The only difference between  $\tilde{\mathcal{F}}(\mathbf{w})$  and  $F'(\mathbf{w})$  is that they use different modulus of strong convexity  $\lambda$ . Thus, following [2], we have

$$\|\tilde{\mathbf{w}}_* - \hat{\mathbf{w}}'_*\| \leq \frac{1 - \gamma^{-1}}{\gamma^{-1}} \|\tilde{\mathbf{w}}_*\| \leq (\gamma - 1) \|\tilde{\mathbf{w}}_*\|$$

Hence,

$$\|\hat{\mathbf{w}}'_*\| \leq \gamma \|\tilde{\mathbf{w}}_*\| = \gamma \|\hat{\mathbf{w}}_* - \tilde{\mathbf{w}}\|$$

which completes the proofs. □

## References

- [1] S. Boucheron, G. Lugosi, and O. Bousquet. Concentration inequalities. In *Advanced Lectures on Machine Learning*, pages 208–240, 2003.
- [2] L. Zhang, M. Mahdavi, R. Jin, T. Yang, and S. Zhu. Recovering the optimal solution by dual random projection. In *COLT*, 2013.
